# Supplementary material for: Coexistence of bacterial leucyl-tRNA synthetases with archaeal tRNA binding domains that distinguish tRNALeu in the archaeal mode
Source: PubMed Central journal article supplement — Nucleic Acids Res. 2014 Feb 5;42(8):5109–24. doi: 10.1093/nar/gku108 (PMC4005665; doi:10.1093/nar/gku108), 2014-02-05
Supplement: supp_gku108_nar-02548-a-2013-File003.pdf [file supp_gku108_nar-02548-a-2013-File003.pdf]

**Supplementary Table 1.** Aminoacylation kinetics of *NmLeuRS1* for *NmtRNA*<sup>Leu</sup>(GAG) and *NmtRNA*<sup>Leu</sup>(GAG)-A47cC at 40 °C<sup>a</sup>

| tRNA <sup>Leu</sup>                      | $K_m$ ( $\mu$ M) | $k_{cat}$ ( $s^{-1}$ )             | $k_{cat}/K_m$<br>( $mM^{-1} s^{-1}$ ) | Activity<br>Ratio |
|------------------------------------------|------------------|------------------------------------|---------------------------------------|-------------------|
| <i>NmtRNA</i> <sup>Leu</sup> (GAG)       | 7.73 $\pm$ 0.22  | (6.40 $\pm$ 0.19) $\times 10^{-2}$ | 8.28                                  | 1 <sup>b</sup>    |
| <i>NmtRNA</i> <sup>Leu</sup> (GAG)-A47cC | 20.2 $\pm$ 1.1   | (1.24 $\pm$ 0.03) $\times 10^{-2}$ | 0.614                                 | 0.07              |

<sup>a</sup>The results are the average of three independent repeats with standard deviations indicated.

<sup>b</sup>The activity of *NmLeuRS1* for *NmtRNA*<sup>Leu</sup>(GAG) is defined as 1.

A-1

1 Ec ..MQEQYRPEEIESKVVQLHDEKRTFEVTEDESKSEKYVCLSM LPPYPSGR LHMGHVNRNYITGDVIARYQRMLGKNVLP...  
Tt .....MEKYNPHAI EAKWQRFWEKGFMKAKDLPPGGRGKQ..YVLVMPFPYPSGD..LHMGHLKKNYITMGDLVLRFRRMGGYEVLELP...  
Bs .....MSFQHKBEIEKKWQTYWLENKTFATLDN.NEKQKF.YVALDMFPYPSPGAGLHVGHVPEGYTATDLRSRMKRMGGYDVLLEP...  
Hp B .....MQTRRRFDHTEIEHRWQBAWDDADVFHIDDE..ATDPT.YVLGMFPYPSGQ..LHMGHVRNRYITDARYKRMGGENVLELP...  
Nm 1 MESYASTLSLYKQMSDAGYDHAAVQRWQAADDDADAVRTSDD..VDDPT.YVLGMFPYPSGK..LHMGHVRNRYITDARYRQMGGDDVLELP...  
Hh 1 .....MTTGEERERGFDDHTEIEPRWQRTWDEADVFRIIDD..ESDPE.YVLAMFPYPSGS..LHMGHVRNRYITDARYFRMRGGESVLELP...  
Nm 2 .....MTNQYDHAQVQEFWQYVWERDGVABELPDG..AVDPT.YVLGMFPYPSGT..LHMGHVRNRYITDARYRRLRGDDVLELP...  
Hh 2 .....MSRRYDHDARVQBYWQQAWERDGVFPCPTD..AENPT.YVLGMFPYPSGS..LHMGHVRNRYITDARYRRLRGDDVLELP...  
2 Ph .....MABLNFKAIEBKWKQRLEAKIFBPNIRDKPKKPKFYITVAPPYLSGH..LHVGHARTYITIPDVIARYFRMRGGYNVLELP...  
Si 1 .....MYNDFFNISIAKQWABWEKSKVPBANI..DYSKPKFPI TVPFPYTNSP..MHVGHGRTYVTVADVIARYLRMRGGYNVLELP...  
Si 2 .....MNNVAHKWQTKWEBAKVYESNP..NSNRSKPFTTVAPPYNSP..MHI GHARTYVTVADVIARYLRMRGGYNVLELP...  
Hp A .....MDYDPQELBARWRREKSESGRYEADP.DADADDATFVTVFPYPSGG..MHI GHARTYVTVADVIARYLRMRGGYNVLELP...  
Hv .....MDYDPQELBARWRREKSESGRYEADP.DADADDATFVTVFPYPSGG..MHI GHARTYVTVADVIARYLRMRGGYNVLELP...

1 Ec I GWDAPGLPAEGA AVKNNT .....APAWTYDN IAYMKNQ..LKM LFGFGYDWSRELAATCT..PEYYRWEQRFFTBLY...  
Tt MGWDAPGLPAENAL KFGV .....HPKDWTYANI RQAKES..LRLMGILYDWDREBVTTCB..PEYYRWNQWIFLKMW...  
Bs MGWDAPGLPAEQYALDTGN .....DPAVFTKQNI DNFRRO..IQALGFSYDWDREBINTTD..PEYYKWTQWIFLKLK...  
Hp B MGWDSFGLPAENAI ERDT .....NPRDWTLSCL DTMREQ..MEGMGFGYDWDREBITCQ..PDYYRWNQWLFTRFR...  
Nm 1 MGWDAPGLPAENAKDRDT .....NPRDWFDCI DTMRDQ..MRAMGFGYDWDREBITCTC..PDYYRWNQWLFPSRFH...  
Hh 1 MGWDSFGLPAENAEERDT .....NPRDWTMQCI DSMRDQ..LTEMGFGYDWDREBITACE..PDYYQWNQWLFKQFC...  
Nm 2 MGWDAPGLPAENAA YERAS .....DPESWTRACI RMRREE..LET LFGFGYDWSREBITCE..PSYYRWNQWLFKRFH...  
Hh 2 MGWDAPGLPAENAA YERDT .....DPESWTRTCI DQMKAD..LREMFGYDWSREBITCTD..PEYYQWNQWLFQPY...  
2 Ph MAWHITGSPVIGIABRIKNRDPKTIWIYRDV..KVPBEILWTFEDPI NIVKYFMKA AKET..FIRAGFSYDWSREBFTTSLFP...  
Si 1 PAFQFTGTPVLA IADSI RRGDVDMIBFKSV..GVPBDKI KBLGD PYKLA EYFKBAKMT..AKSIGMSIDWRRSFTTID..TRFEKFIHQWLRLKLK...  
Si 2 MAFH YGTPI MAMADAI AKGD KELIETFKDI..EISPDVI PRMSD PFMANYFKIEDIKTS..MREI GLGIDWRRBFTTID..PEFSFVTFWQFHKLK...  
Hp A IAWHVTGTPVIGAVERLKRREPEQMSVLDTD..NVSDDELSBEMETPMGFARHFIBDSYKKNMQSLGLS DWRREBFTTND..BRYSKFIWQYBTLK...  
Hv IAWHVTGTPVIGAVERLQRREBKQLSVLTD..NVPEDTLSDES PMGAWARYFI BEHYKKGMSLGLS DWRREBFTTANN..BRYSKFIWQYBTLK...

1 Ec K KGLVYKKTSAWVWCPNDQTVLANEQVLDGC.....CWR.CDTKVERKETPQWFITKITAY...  
Tt EKGLAYRAKGLVWVWCPKCCQTVLANEQVVEGR.....CWR.HEDTPVKRELEBQWYLRTITAY...  
Bs EKGLAYVDEVPVWVWCPALGTVLANEBVIDGK.....SER.GGHPVERPMKQWMLKITAY...  
Hp B EQLVEREAAEINWVWCPSECTVLAD EQVEGDA.....ELCWR.CDTPVEQRELDQWFLKITAY...  
Nm 1 QEDLVERRDABVWVWCPSECTVLAD EQVEGEA.....BLCWR.CDTPVEQRELDQWFLKITAY...  
Hh 1 EAGLVERQAAELWVWCPSECTVLAD EQVEGEE.....BLCWR.CDTPVEQRELDQWFLKITAY...  
Nm 2 EAGLVEFTGATVWVWCPDCECTVLADAQVAVDEGGQAVTATADEAGDNGDSAGGAHDESNNAHVHEHSTARV..CWR.CGT PVEQRELDQWFFITIDY...  
Hh 2 DAGLV DYGAATVWVWCPDCECTVLADAQVETPP.....BADEGETTAGTGHSHTHG.....GGV.CWR.CGTGVQRELDQWFFITIDY...  
2 Ph EKGYIVKGAHRVRWDPVVGTPLDG HDLMEGE.....CWR.CDTPVEQRELDQWFFITIDY...  
Si 1 ELGYLVTEDDVWVWCPNDNFPVGMHDTRGDI.....CWR.CDTPVEQRELDQWFFITIDY...  
Si 2 SKGYVVKDTHPVWVWCPVHHIIPVGMHDTKGDV.....CWR.CDTPVEQRELDQWFFITIDY...  
Hp A BRGLLEKGLHPVWVWCPVCTNEGMPVTT HDLLGGE.....CWR.CDTPVEQRELDQWFFITIDY...  
Hv DRGRLEKGLHPVWVWCPVCTNEGMPVTT HDLLGGE.....CWR.CDTPVEQRELDQWFFITIDY...

1 Ec ADELLNDLKDLDHWPDTVKMQRNWIGRSEGVEIT..NVNDYD.....NTLTVYTTTRPDTFMGCTYVLA VAGHP LQAQ..KAAE NNP...  
Tt AERLLKDL EGLN.WPEKVKAMQRAWIGRSEGAEIL..PVEGKE.....VRI PVFTTRPDTLFGATFLVLAPEHPLTLELAAP EKRE...  
Bs ADRLLEDLEELD.WPESIKDMQRNWI GRSEGAVH..FAIDGHD.....DSPTVFTTRPDTLFGATFLVLAPEHPLTLELAAP EKRE...  
Hp B ADELDDLDLDDLGWPSNVRMQRNWIGRQHGATVE..EVS EAAASETSSGKQGSRDYGPEVVFTRLDITIFGVTFALAPGHPIAEB LAEED..D...  
Nm 1 ADELLEDIDDLGEPNSVRMQRNWIGRQYGA EVE..EIGG.....HGSVTAFTRLDITIHGATFPALAPGHPIAEB LAEED..D...  
Hh 1 ADELLEDLDDLGWPNVREMQRNWIGRQAGASVA..EVDG.....YGEVDITRLDITIHGATFPALAPGHPIAEB LAEED..D...  
Nm 2 ADELVDGLDDLDQWPEGVREIQRNWI GRQEGARIT..DVSTAAD ESD.....TAVDVFTSTRS DTVFGATFLVLAPEHPLTLELAAP EKRE...  
Hh 2 ADELVDGLDDLDQWPEGVREIQRNWI GRQEGARIT..SIDHDDHDT.....VIAFTLRLDITIHGATFLVLAPEHPLTLELAAP EKRE...  
2 Ph RENGE.....VIYLPAAITLRPETVYGVNMMWVNP NATYV KAKVRRKDKBE...  
Si 1 SESY.....NFMVATSRBELIFGVVALM VNSDAN YVVVYEGKN...  
Si 2 SEKG.....IFPAATLRPETIFGATGLW INPNEMVIANILDKK...  
Hp A DDEAQRASESASSAERRSANRSSGSESPR.....AITVPMATLRPETVHGVTNAYIDPEATYVVEA VDGEBT...  
Hv B.....RDGGD.....VVVPMATLRPETVHGVTNAYIDPEATYVVEA VDGEBT...

1 Ec ELAA FID ECRNT...KVABEAMATMEKKGVDTGPKAVHPLTGE EIPVWAANFVLM EYGTGAVMAVPGHQRDYEPASKYGLNIKPVILAAD...  
Tt EVLAVVEA AAKRK...TEIBRQAGREKTVGFLGAYALNPAATGEERIPITWADYVLFYGYGTGAIMAVPHDQRDYEPARKFGLPKKVI BRPG...  
Bs AVEAYIK EIQSK...SDLERTDLAKTKTVGFTGAYAINPVMGEEKLPVIA DYV LASYGTGAVMAVPGHQRDYEPARKFGLPKKVI BRPG...  
Hp B DIAHFVEE VAD.....PEGDEP...QGVPTDLTATNPATGE EIPVFPVADFVLSDVGTGALMGPVPHDRDHPAFTSMOVDIVPVVAPS...  
Nm 1 DVRHFIEHEAD.....PEGDEP...NGVATHLTATNPTVGE EIPVYVADFVLSDVGTGALMGPVPHDRDHPAFTSMOVDIVPVVAPS...  
Hh 1 EVAEYIETAEQ.....ADEDEL DVTSVFTGRYAVNPAATGE EIPVYVADYVLT DVGTGALYAVPAHDERDHPAFAEHDIDIVQVVEPTED...  
Nm 2 DVATFVDQARTSAPDTGHAARDDFS.TAGVKT DATABPTVGE ELPVYVAYVLADVGTGAVMGPVPHDRDHPAFAEHDIDIVQVVEPHG...  
Hh 2 AVADYVESV.....ASTDDAG.MSGVETDLTATHPTVGE ELPVYVAYVLADVGTGAVMGPVPHDRDHPAFAEHDIDIVQVVEPHG...  
2 Ph ETWIVSKBAAYKLSFDREIBVIEBFKGBKLIK YVRRNPSGDEVI ILLPAEFVDFDNATG VVMSVPHAPFDHVALDLKRETEILBK...  
Si 1 FIISEKAYKKLSYQDK.MKMIKTISTSDIVKLYGINPVTGKKLEI I KSKHVDLISLGTGVVMSVPAHDPH YLAIAEANK..EF EII P...  
Si 2 MILISEKSATKLSFDI DNBIE DKKIKGSKLVGLKVENPITGGKIVVMGADFDASLGTGVVMSVPAHAPFDYYSKILKNNNIGIIP...  
Hp A WLVSESAABKLELQAHQVIRDFHSGERLVGEBHVTNPVTGDDVLLVPASFDADNATG VVMSVPAHSDPDWALQEAKAARRABQSSGQSP...  
Hv WLVSESAABKLELQAHQVIRDFHSGERLVGEBHVTNPVTGDDVLLVPADFDADNATG VVMSVPAHSDPDYVALQEAKADAD...

1 Ec .....GSEPDLSQALTEKGVLFNSG.....EFGLDHBAAFNATA...  
Tt .....EPLPEPLERAYE EPGIMVNSG.....PFDGTES BEGKRKVI...  
Bs .....NVEEAYTGDGEHVNSD.....FLNGLHQBAIEKVI...  
Hp B .....BDDVPDVS EAYTEDGVLVNSG.....DIDGLDSBARERLE...  
Nm 1 .....EGEPEVPDIS EEAFTEDGVLVNSG.....EYDGLS BTARERLT...  
Hh 1 .....ADADPEDIDVQEAAYPEDGLVNSG.....EYDGLSSNEARDR...  
Nm 2 .....NGTGSDDGVATDAPMTGEGT LVLES PADRAS...GQPSBDVREHLV...  
Hh 2 .....DGSGTD...LPHAPYTDGOMLTDG...EYDGLASSAARERLR...  
2 Ph .....DIDPRIVENI TYISLIKLEG...YGDFFPAVEEVNKLGIKSKDKKELBQATKTIYKABYHKVFKVP..PYE GKPVEVLEKBAIA...  
Si 1 .....VIRTEEBLBI PGESA VLQT...KNIYALKDFMESIYRTEYKGYMKDILSLVDPFLKQYVKEN...IVGKQVBARKNTI...  
Si 2 .....VITVEGLNDELAKDVVEKNN...PKNDEBLLKLTBYRTEYKGIKLSLLENLIEYERNELKN...LGLPVPKGRKELIT...  
Hp A RDAADARMEAYGDPEEVAAT EPKAI DVEG...YGFPAEDA VVBHIEDSSDPALEDATQEVYRNFHSGKLRGMYDDVAGEI VEDVRRDLDK...  
Hv .....YLFESFGIDPADVADI EPIPI LDIDSBDT YGI PAESA VBNRGI ESSDDPALBKAT KDLYNKEFHAGRLKEFFYGDYAGGLVEVRRDLDK...

# A-2

```
          410      420      430      440      450      460      470      480
1 Ec  DKL TAMGVGRKVN YRLRDWGSRQRWGAFTPMVLTLED.GTVMPTDQDLFVILPEDVVMGDGIT.....SPTKADPPEAKTTVN..EMPALRE
Tt  AWLBEKGLGKGRVTYRLRDWLSRQRWGTPIPMVHCEA.CGVPVPEBEEPLVLPDLKDVBDIRP...KGKSPLEAHPFYEYTTCPKCGGPAKRD
Bs  AWLBETKNGEKKVTYRLRDWLSRQRWGEPIPIVHWED.GTSTAVPEBEEPLVLPKTDDEIKPSG...TGESPLANIKBWEVTDPETKKGRRE
Hp_B GAI ES...AAHDVQYRLRDWGSRQRWGTPIPIIHCEB.CGVPVPEDEDLVPELPEFVRT.....TGNPLDAAAEWKHVNCPECGADARRE
Nm_1 ELLKSL...AEHTQYQLRDWGSRQRWGTPIPVVHCHDCS.SVVPPEBEEPLVPELPEFINT.....TGNPLDAAAEWKHTTCEPCGADATRE
Hh_1 BEFD...GEHRTYENLRDWGSRQRWGTPIPMIHCCD.CGVVPEDEDLVPELPEFVHT.....TGNPLDAAAEWKHVDCPCDADAVRE
Nm_2 DDHEA...IDPDVTYRLRDWLSRQRWGTPIPVHCBDD.CGHLVPEDEDLVPELPEFVQT.....TGNPLDAAAEWKETSCDCCGPAERE
Hh_2 .BHGA...ABSAVTYRLRDWLSRQRWGTPIPIVHCBDD.CGHLVPEDEDLVPELPEFVQT.....TGNPLDAAAEWKETTCCDADAVRE
2 Ph  KEMLEK...GIABIMYEFABKNVSRFGNRAVIKIIDQWFDYGNPEWKBKAR KALERMKILPETRRAQFEAIDWLDKKACARKIGLTPPLPVD
Si_1 ELLKSL...NMYDTIYHISNGPIYCRCGAETVPKKIKDQWFIAYDNPKWKASVLKAINNIBLIPNLAKSBLEKTIPNTRREPIGRSRGIVKLPVD
Si_2 NFLISK...GLGRKIFETIMNKPVYCRCGTEIVVKILKDQWFLDYSNEEWKELAR KSLSKMQUIPEESRKDFEFTWLEKRACARTRGLTPPLPVD
Hp_A AEFQEQ...GSFDTMHSES.EEVVCRCG.GAVEVAEQDTWFLRYNDEAWKAKAHEVVAELDAIPENTREQYDHTIDWLNWPCIRNYGLTRLPVD
Hv  ADGVEA...GQFDVMQSES.EVVVCRCG.GDVVVAEQDTWFLSYDDEDDWKELAHDVADGLDAIPENTREBYHHTIDWLNWPCIRNYGLTRLPVD
```

```
          490      500      510      520      530
1 Ec  TD.TFDTFMESWYIARVYTCQYKRGMLD.....SFAANYWLPVDIYIGGIEHAIM
Tt  TD.TMDTFFDSWYIARYTDPHNDRLPFD...PEKANAWMPVDQYIGGVEHAVL
Bs  TN.TMPQWASCSWYFLRYIDPHNDQLAS...PEKLEKWLVDMYIGGAEHAVL
Hp_B TD.TMDTFFDSWYFLRYVSPHLDAPFD...TEQADDWMPVDQYVGGIEHAVM
Nm_1 TD.TMDTFFDSWYFLRYVSPDLBAPFD...LARANDWMPVDQYVGGIEHAVM
Hh_1 TD.TMDTFFDSWYFLRYTSPEMADAPFD...ABRASDWMPVDQYVGGIEHAVM
Nm_2 TD.TMDTFFDSWYFLRYFLSPLDADAPFD...TELANEWMPVDQYVGGIEHAIL
Hh_2 TD.TMDTFFDSWYFLRYLSPHFDAPFD...QETADEWLPVDQYVGGIEHAVL
2 Ph  PEWVIESLSDSTIYMYVYTI SRHINKLRQEGKLDPEKLTPEFFDYIFLEEFSEBDEKELEKKTGIPABIHEMKBEFEYWPVDWRCSGKDLIPN
Si_1 BSQIVESLSDSTLYTVLYTIIYKM.....PVDINDELDFMFLGKGD...TKELEKKGAD...LVQLREBFLYWPVDQRHTGRDLIPN
Si_2 KKWVIESLSDSTIYMYVYTI SHKIKQY...KISPSKLTQEFWDVYMLGIGN...LEDVSKNTGIPSNIKELREBFLYWPVDIRHSGKDLIPN
Hp_A DEFWIEPLSDSTIYMYVYTI IAHRI SDVP...VEBLDKBFFDLPFYGSBA...VDDPNBTALALREBWDYWPVDYRCSANDLVSN
Hv  DQFVIEPLSDSTIYMYVYTI IAHRLQBIIP...TEBLTQEFFDALFYGPDA...VDDAPEKALDLREBWDYWPVDYRFSNDLIPN
```

```
          540      550      560      570      580      590      600      610      620
1 Ec  HLLYFRFFPKLMDRAGMVN.SDEPAKQLLCCGMVLADAFYVVGenger.....NwvSPDAIVERDEKGRIVKAKDAAGHBLVYTGMSKM
Tt  HLLYSRFFPKLHLDLMVK.VBEPFQGLFTCGMVLAWTDGFPVVEGSSVRLPEPTRIRLEIPESALSLEBDRKMGAEALRPHEDGTLHLWKPAM
Bs  HLLYARFFPKFLYDIDVVP.TKEFPQKLYNCGMVLGENNE.....K
Hp_B HLLYSRFFPKVISDMOMLD.HREPFNTLVT CGMVL.....LDGD KM
Nm_1 HLLYSRFFPKVLADHGLE.HREPFNTLVLACGMVQ.....LDGE KM
Hh_1 HLLYARFFPKVLDDLDMVDGVRPFNTLVTNCGMVLG.....LDGN KM
Nm_2 HLLYIRFFVTRALADLGLD.QREPVERLVSQGTVL.....YBGE KM
Hh_2 HLLYIRFFVTRALSIDIGLD.RBEPVERLINCQTVL.....HSGE KM
2 Ph  HLTFFIFNHVAIFREHWP.....KGIAVNGFT.....LEQG KM
Si_1 HLTFFIYNHLAIFGKYLP.....KRIVINGFVR.....VGG KM
Si_2 HLTFFIFNHAAIFQBNLWP.....KAIAVNLVL.....YEG KM
Hp_A HLTFFFLFHABLFDPANWP.....QGITVGMGL.....LEGE KM
Hv  HLTFFYQFHGELFDBPQNP.....RGIIVIMGMGL.....LEGE KM
```

```
          630      640      650      660      670      680      690      700      710
1 Ec  SSKKNGITDPQVMVERGADTVLRFMMFASPADMTLEWQESGVEGANRFLKRVWKLVEHTAKG...DVAALNVDALTENQKALRRDVKHTIAKVT
Tt  SSKKNGVMVGPVFKGADIARITILFAAPPENEMVTEBEGQAWRFLNRIYRRVADREBALLETSGVFQABALEGKDRILYGLHETLKKVT
Bs  SSKKNGVNPDEIVASEGADTLRLYEMFMGLDASIAWSESGLDGARRFLDRVWRLIED.....SGELNGKIVEGAGETLERVYHBTVMKVT
Hp_B SSKKNGVNSPQRIVEEYGADTARLFTMQAAQPEKDFDWTBEGVKSSEYFLQRLVAGAVESFABS.TPD...GDRDEIABYVERBIDATVIAIAN
Nm_1 SSKKNGNTVSPQRIVEEYGADTARLFTMQAAQPEKDFDWTBEGVKSSEYFLQRLVAGAVESFATE..QPA...GEDDATARYVANEIDATI IAIAG
Hh_1 SSKKLDNGVNSPQRIIEEYGADTARLFIMEAAQPEKEFWASPEGVQSAHSFLQNVYTLVSEYANG..EABTATDLANGDDIADYVAREIDATAANAT
Nm_2 SSKSKGNVVT...DEYGAETTLFVLSAAHPEQDFEWANDVRGAYDLQALYSMATFVFE...GETR...VERVSHDEPVDREIDRTI IAAVT
Hh_2 SSKKGNDIAP...HEVGAETTLFVLSAAHPSQDFEWTVKDVSAYDFQOTLYRLVTEYTD...TETR...TESTDHDAYLREIDRTI IAAVT
2 Ph  SSKKGNVNLNFI DAIEEN GADVVRLYIMSLAEHDSDFDWRKKEVGLKRLKQIERFPEYELISQFAE...YEVKGNVBLKDI DRWMLHRLNKA I KETT
Si_1 SSKLKNIIYTLSKAIKEP GVDVPRITLTSTSDLLQDLDFNENLVNPIAEQLKVVYDLIDRLLS...INTE.IKGLRTADEWLLSKIRBIVEKVT
Si_2 SSKLRNIIPLRKGKLMV GVDVPRITAVSSTADMGSDVNFSBSLKTVGETLRMYELFKSLDN...YTED.TGFPF...BKWLLSRIYBITTNTT
Hp_A SSKKHVVLPENAI BKYGADTVRFPLMNSAEPWQDYDWRSEQVSTGNQLRFPWNRANEIIS...APEGBRDLQRI DRMLLSKLGQTVREV
Hv  SSKKHVVVLPGEAIGYGADTVRFPLLNSAEPWQDYDWRDLDVGSVHDLRFPWNRANQBIITD...PGPDDQPDLETVDRMLLSKLGQTVRDVT
```

```
          720      730      740      750      760      770      780
1 Ec  DLTGRRQT FN TAI AALME L MNK L A K A P . . . . . T D G B Q D R A L M Q E A L L A V V R M L N P F T P H I C F T L W Q E B K G E G D . . . . . I D N A P W P
Tt  E D L E A L R . F N T A I A A L M E F L N A L Y E Y R . . . . . K D . R P V T P V Y R T A I R Y I L Q M L F P F A P H L A E B L W H W F . W P D S . . . . . L F E A G W P
Bs  D H Y E G L R . F N T G I S Q L M V F I N E A Y K . . . . . A T E L P K E Y M E G F V K L L S P V A P H L A E B L W E K L G H S G T . . . . . I A Y B A W P
Hp_B D E F E S L T . F N G A L R E T Q E L T S L L A R Y R . . . . . E E T S P H G T L E R G L R T V V K L L A P V T P H I C E L E W S E L G . G E G . . . . . F V V B A E W P
Nm_1 G E Y D D L T . F N R A L R E T Q D L V Q T L R Q Y A . . . . . A Y T E P H A B T Y E R G L S A V V R L L A P V A P H L A E B L Y A E L D T G E D G D E T E F V V D A P W P
Hh_1 V E F E D F R . F N H A L Q A V R E L V S L L R R Y Q . . . . . E A T T P D A D T F E R G L A T A A K L L A P V A P H A E E M W A B L G H D D . . . . . L I A B A E W P
Nm_2 T E F E R F R . F H R V V T E V Q E F A R L L G R Y A . . . . . G Y D R I H G E V Y R G R L T I A A L T S P I A P H L G E B L W N K L R G D G . . . . . L V B A D W P
Hh_2 B E Y D R F R . F H R V I G E L Q R F A R L L G R Y A . . . . . G Y D R P Y Q F A Y G R G L R V L A G L V A P I A P P L A E E M W Q L D E D G . . . . . L V A E S R W P
2 Ph  N A L B E F R T R A V Q W A P Y S I M N D L R W Y L R R T E G R D D E A K R Y V L R T L A D V V R L M A P F T P H I C E L E W E K L G . G E G . . . . . F V S L A K W P
Si_1 N D I T S P E P R D A V N L L Y E M Y D V L R D Y F D L I E I P . . . . . N Q E V I R K I S I W I R A L A P F A P H I A E B L W H K I S . S T . . . . . F V S L E K Y P
Si_2 K H M A L E L R D A A N E L L Y F S S D L D E Y F G M V N A E G R R A N N K L R E V L T I W K L L I T P F A P H L A E B I W H E I L K Q T T . . . . . F I V N E K W P
Hp_A D A M D A L F E T R T A S Q D A F Y G F E E H L K W Y R K R T D T D . R S G A R W T L R T V L N A R L R L L A P F I P F M A T E L H E R I T . G N . . . . . P I A B A E W P
Hv  T A M D E A B T S A S Q A A F Y N F E E S L R W Y R R R T D L D . R P A A K W T L R T V L E T R L R L L A P F I P F M T N E L H B Q L T . . . . . P A B D A P W P
```

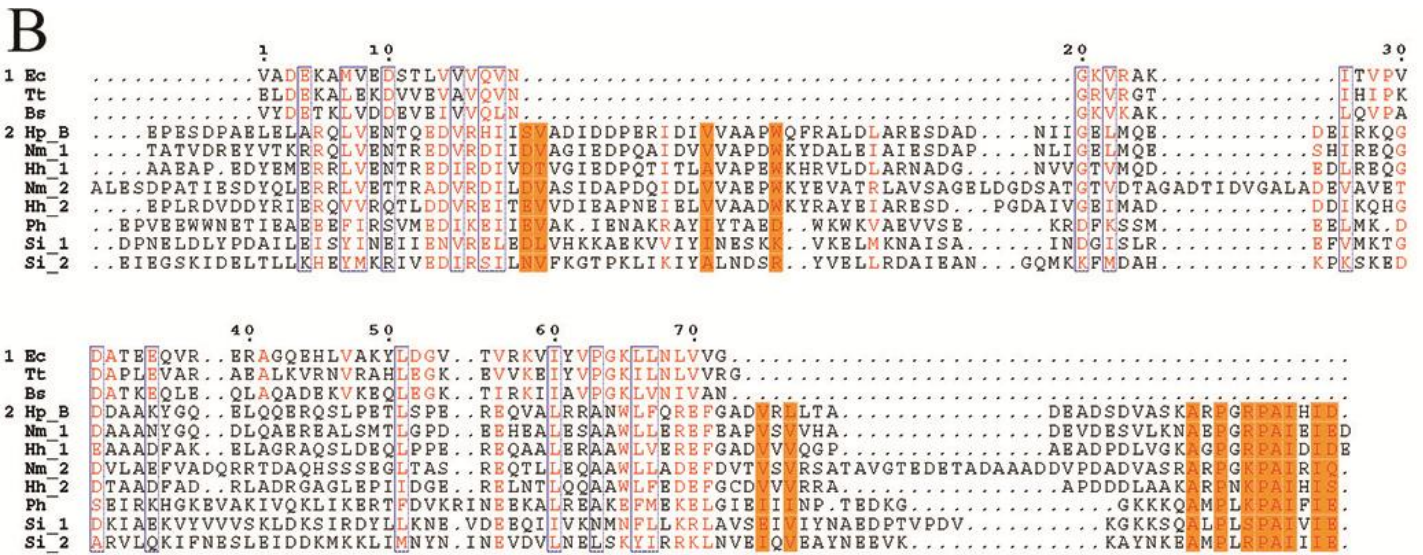

**Supplementary Figure 1.** Sequence alignment of the N-terminal region (the Rossmann fold, CP1, CP2 and  $\alpha$ -helix bundle domain) (A) and C-terminal domain (B) of LeuRSs, respectively. Ec, *Escherichia coli*; Tt, *Thermus thermophilus*; Bs, *Bacillus subtilis*; Hp\_B & Hp\_A, *Haladaptatus paucihalophilus* LeuRS [Bacterial type (accession No. WP\_007982262.1) & Archaeal type (accession No. WP\_007982263.1)]; Nm\_1 & Nm\_2, *Natrialba magadii* LeuRS1 & LeuRS2; Hh\_1 & Hh\_2, *Haloarcula hispanica* LeuRS [LeuRS1 (accession No. YP\_004794828.1) & LeuRS2 (accession No. YP\_004797622.1)]; Ph, *Pyrococcus horikoshii*; Si\_1 & Si\_2, *Sulfolobus islandicus* LeuRS [LeuRS1 (accession No. YP\_002829648.1) & LeuRS2 (accession No. YP\_002829589.1)]; Hv, *Haloferax volcanii*.

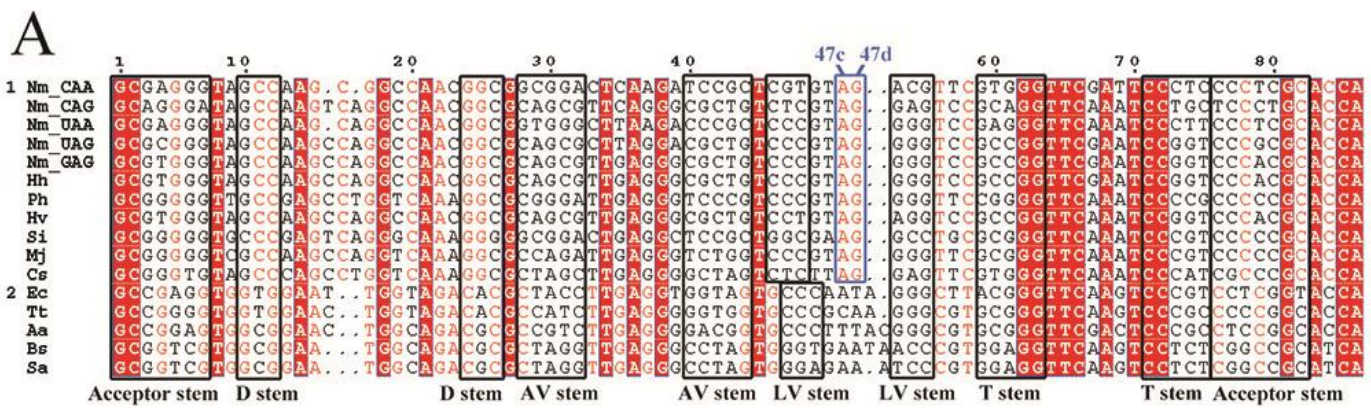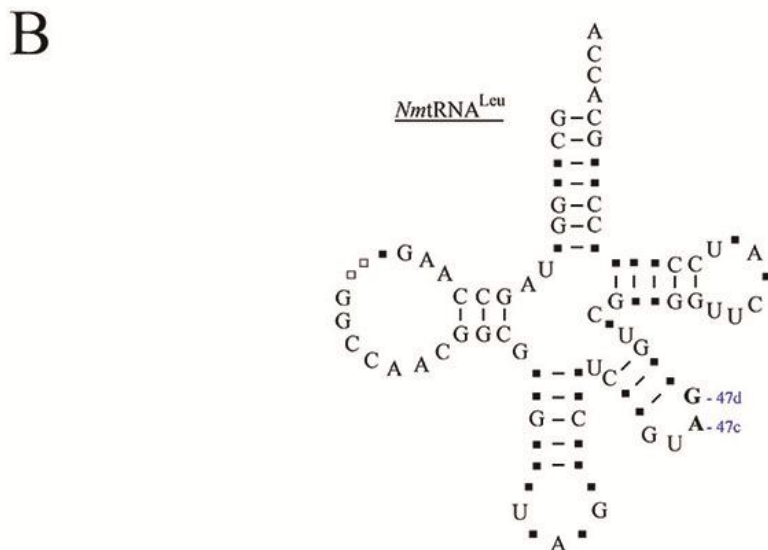

**Supplementary Figure 2.** *NmtRNA<sup>Leu</sup>* are typical archaeal tRNA<sup>Leu</sup> with conserved A47c and G47d bases. (A) Sequence alignment of all five *NmtRNA<sup>Leu</sup>* isoacceptors and tRNA<sup>Leu</sup>(GAG)s from different species. Nm, *Natrialba magadii*; Hh, *Haloarcula hispanica*; Ph, *Pyrococcus horikoshii*; Hv, *Haloferax volcanii*; Si, *Sulfolobus islandicus*; Mj, *Methanocaldococcus jannaschii*; Cs, *Cenarchaeum symbiosum*; Ec, *Escherichia coli*; Tt, *Thermus thermophilus*; Aa, *Aquifex aeolicus*; Bs, *Bacillus subtilis*; Sa, *Staphylococcus aureus*. Acceptor stem, D stem, AC stem (Anti-codon stem), LV stem (Long variable stem), T stem and the site of 47c, 47d in archaeal tRNA<sup>Leu</sup> are specified. (B) Cloverleaf structure of *NmtRNA<sup>Leu</sup>* with conserved bases specified. The site of A47c and G47d, non-conserved (■) and divergent (□) bases were indicated.

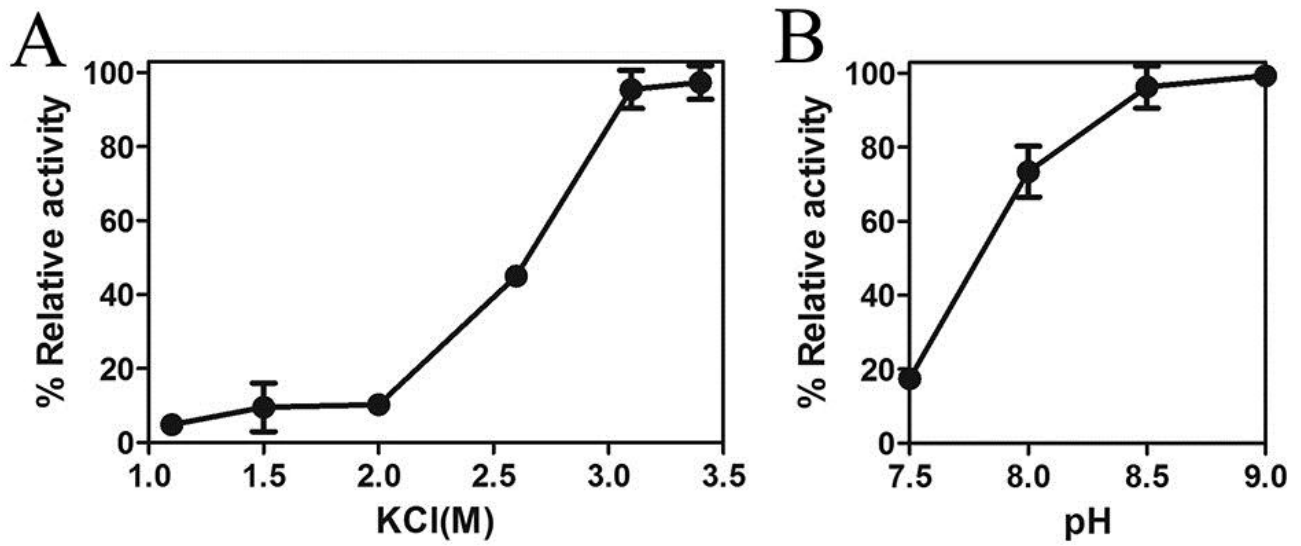

**Supplementary Figure 3.** Optimization of aminoacylation conditions of *NmLeuRS2*. (A) Relative aminoacylation activity of *NmLeuRS2* under different KCl concentrations (●). The activities of *NmLeuRS2* in 3.4 M KCl were defined as 100%; (B) Relative aminoacylation activities of *NmLeuRS2* under different pH conditions of Tris-HCl (●). The activity of *NmLeuRS2* in Tris-HCl pH9.0 was defined as 100%.

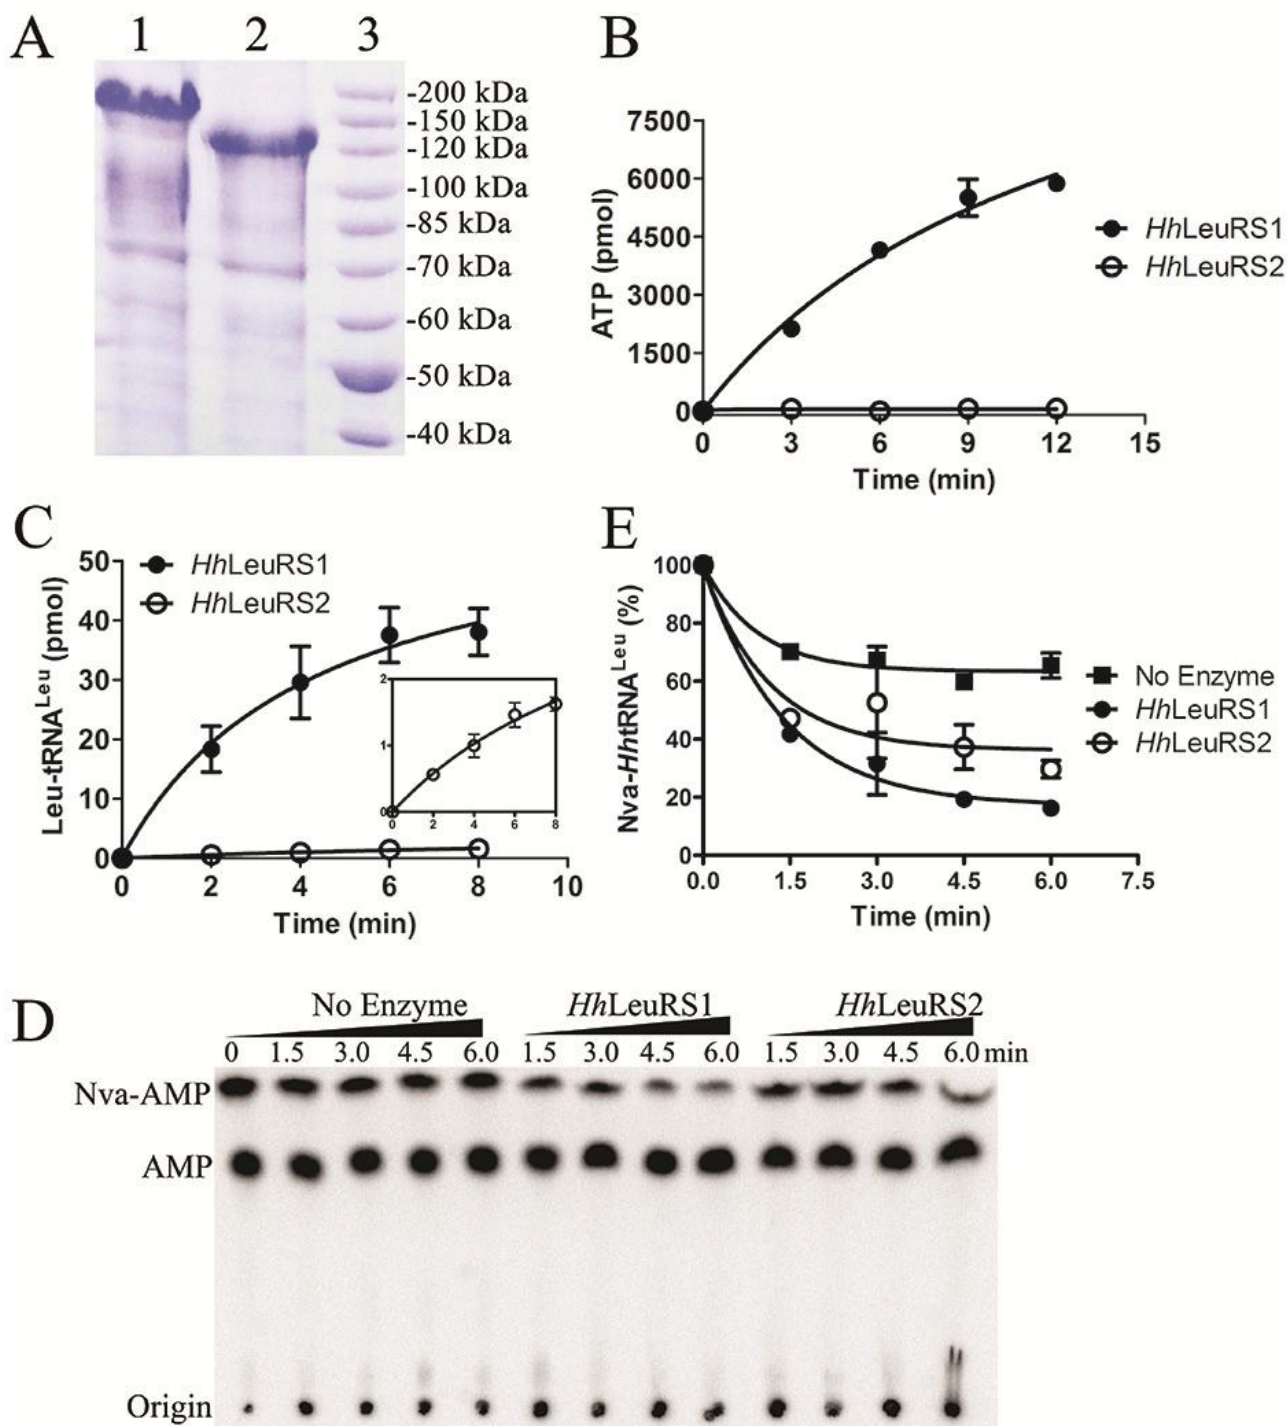

**Supplementary Figure 4.** *HhLeuRS1* showed higher amino acid activation, amino-acylation and post-transfer editing activities than *HhLeuRS2*. (A) The 10% SDS-PAGE analysis of the purified *HhLeuRSs* from *E. coli*. Lanes: 1, 2, 3 are *HhLeuRS1*, *HhLeuRS2* and molecular markers (Thermo Scientific, #26614), respectively; (B) The amino acid activation activities of 1  $\mu$ M *HhLeuRS1* (●) and 1  $\mu$ M *HhLeuRS2* (○) for 5mM Leu in pH 8.5, 3.5 M KCl solution; (C) The amino-acylation activities of 400 nM *HhLeuRS1* (●) and 400 nM *HhLeuRS2* (○) for 4  $\mu$ M *HhtRNA*<sup>Leu</sup>(GAG) in pH 8.5, 3.5 M KCl solution; (D) Representative graph showing the post-transfer editing activity of 500 nM *HhLeuRS1* and 500 nM *HhLeuRS2* in pH 7.5, 3.5 M KCl solution based on TLC assays; (E) Quantification of the de-acylation activities of *HhLeuRS1* (●) and *HhLeuRS2* (○) in D.

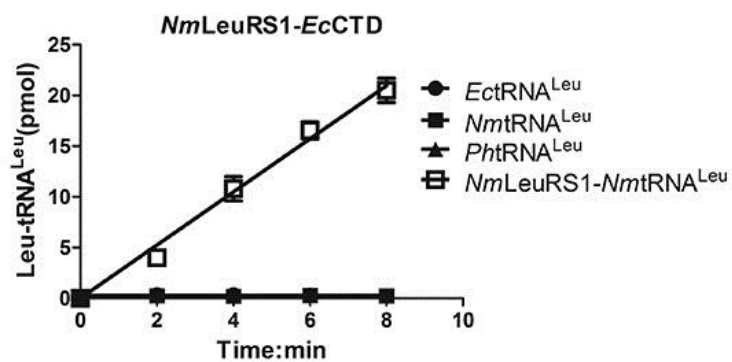

**Supplementary Figure 5.** The aminoacylation activities of *NmLeuRS1-EcCTD* for *NmtRNA*<sup>Leu</sup> (■), *EctRNA*<sup>Leu</sup> (●) and *PhtRNA*<sup>Leu</sup> (▲). The aminoacylation activity of *NmLeuRS1* for *NmtRNA*<sup>Leu</sup> (□) was used as the positive control.



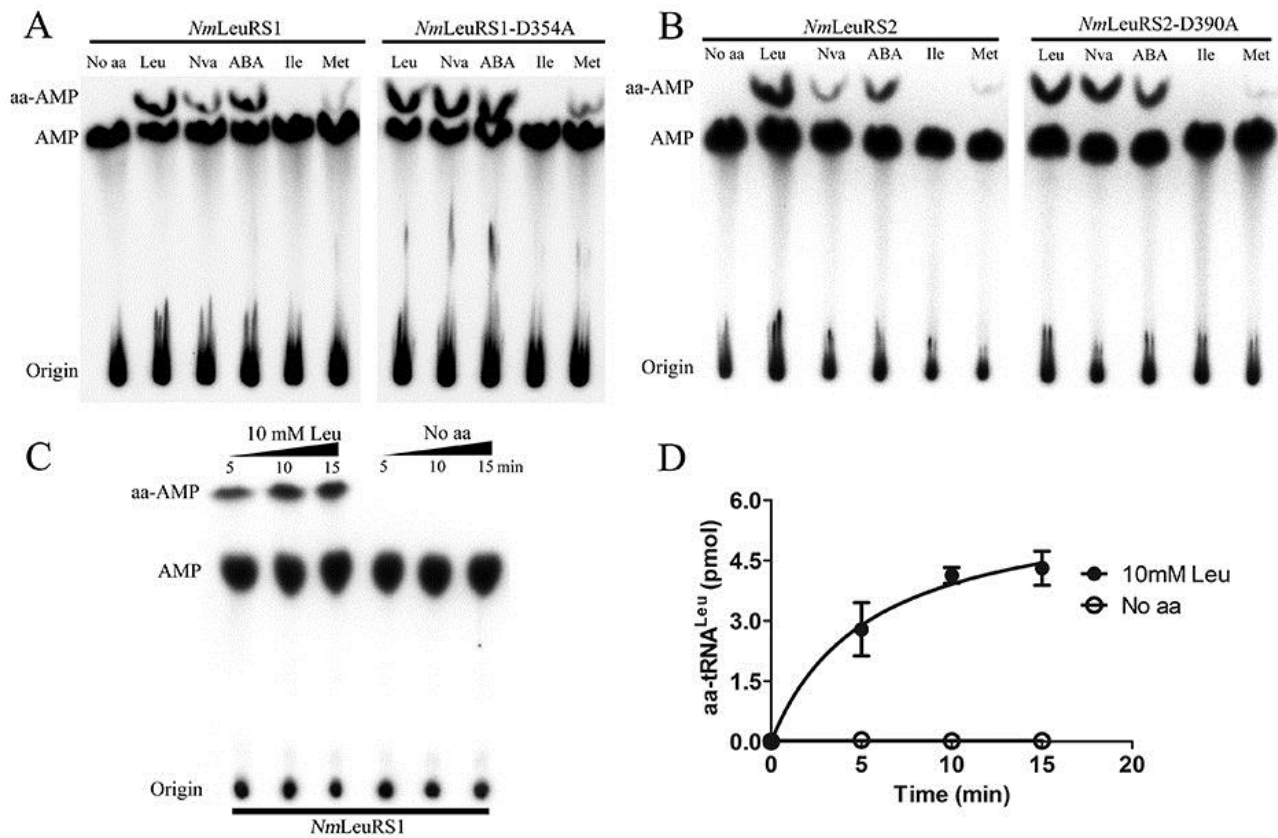

**Supplementary Figure 6.** The aminoacylation activities of *NmLeuRS1* and *NmLeuRS1-D354A* (A), *NmLeuRS2* and *NmLeuRS2-D390A* (B) for cognate Leu and non-cognate Nva, ABA, Ile and Met based on TLC assays. (C, D) The aminoacylation activities of *NmLeuRS1* for Leu and without amino acid (No aa) were used as the positive and negative control, respectively.
